# Supplementary material for: Preparation of Volborthite by a Facile Synthetic Chemical Solvent Extraction Method
Source: MDPI journal article supplement (doi:10.3390/nano13131977), 2023-06-29
Supplement: s1 [file s1]

## *Electronic Supporting Information (ESI)*

# Preparation of Volborthite by a Facile Synthetic Chemical Solvent Extraction Method

**María Guadalupe Sánchez-Loredo <sup>1,2,\*</sup>, Salvador Antonio Palomares-Sánchez <sup>3</sup>,  
Gladis Judith Labrada-Delgado <sup>4</sup>, Toni Helbig <sup>1</sup>, Paul Chekhonin <sup>5</sup>, Doreen Ebert <sup>1</sup>, Robert Möckel <sup>1</sup>,  
Jones Owusu Afriyie <sup>1</sup> and Norman Kelly <sup>1</sup>**

<sup>1</sup> Helmholtz-Zentrum Dresden-Rossendorf e.V., Helmholtz-Institut Freiberg für Ressourcentechnologie, Chemnitzer Str. 40, 09599 Freiberg, Germany; tonihelbig@yahoo.de (T.H.); d.ebert@hzdr.de (D.E.); r.moeckel@hzdr.de (R.M.); ojoovia@gmail.com (J.O.A.); n.kelly@hzdr.de (N.K.)

<sup>2</sup> Instituto de Metalurgia, Facultad de Ingeniería, Universidad Autónoma de San Luis Potosí, Sierra Leona 550, San Luis Potosí 78210, Mexico

<sup>3</sup> Facultad de Ciencias, Universidad Autónoma de San Luis Potosí, Av. Chapultepec 1570, San Luis Potosí 78295, Mexico; sapasa04@ciencias.uaslp.mx

<sup>4</sup> Instituto Potosino de Investigación Científica y Tecnológica, Camino a la Presa San José 2055, San Luis Potosí 78216, Mexico; gladis.labrada@ipicyt.edu.mx

<sup>5</sup> Helmholtz-Zentrum Dresden-Rossendorf e.V., Institut für Ressourcenökologie, Bautzner Landstraße 400, 01328 Dresden, Germany; p.chekhonorin@hzdr.de

\* Correspondence: msanchez@uaslp.mx

**Table S1.** Mineralogical phases identified for the samples PS-4 to PS-11 using the software Profex.

Quantification should be carefully taken into account due to the broad signal obtained for  
volborthite

| Sample | Phases                                                                                                                                                                | Observations                                                |
|--------|-----------------------------------------------------------------------------------------------------------------------------------------------------------------------|-------------------------------------------------------------|
| PS-4   | $\text{Cu}_3\text{V}_2\text{O}_7(\text{OH})_2 \cdot 2(\text{H}_2\text{O})$ , Volborthite (ICSD_63282, Monoclinic, C12/m1), 90%. Sodium chloride 6%, Clinoatacamite 4% | Broad peaks corresponding to Volborthite and Clinoatacamite |
| PS-5   | $\text{Cu}_3\text{V}_2\text{O}_7(\text{OH})_2 \cdot 2(\text{H}_2\text{O})$ , Volborthite (ICSD_63282, Monoclinic, C12/m1), 99.5%. Sodium chloride 0.5%                | Broad peaks corresponding to Volborthite                    |
| PS-6   | $\text{Cu}_3\text{V}_2\text{O}_7(\text{OH})_2 \cdot 2(\text{H}_2\text{O})$ , Volborthite (ICSD_63282, Monoclinic, C12/m1), 99%. Sodium chloride 1%                    | Broad peaks corresponding to Volborthite                    |
| PS-7   | $\text{Cu}_3\text{V}_2\text{O}_7(\text{OH})_2 \cdot 2(\text{H}_2\text{O})$ , Volborthite (ICSD_63282, Monoclinic, C12/m1), 96%. Sodium chloride 4%                    | Broad peaks corresponding to Volborthite                    |
| PS-8   | $\text{Cu}_3\text{V}_2\text{O}_7(\text{OH})_2 \cdot 2(\text{H}_2\text{O})$ , Volborthite (ICSD_63282, Monoclinic, C12/m1), 100%                                       | Broad peaks                                                 |
| PS-9   | $\text{Cu}_3\text{V}_2\text{O}_7(\text{OH})_2 \cdot 2(\text{H}_2\text{O})$ , Volborthite (ICSD_63282, Monoclinic, C12/m1), 99%. Sodium chloride 1%                    | Broad peaks corresponding to Volborthite                    |
| PS-10  | $\text{Cu}_3\text{V}_2\text{O}_7(\text{OH})_2 \cdot 2(\text{H}_2\text{O})$ , Volborthite (ICSD_63282, Monoclinic, C12/m1), 2%. Sodium chloride 98%                    | Sharp peaks corresponding to NaCl                           |
| PS-11  | $\text{Cu}_3\text{V}_2\text{O}_7(\text{OH})_2 \cdot 2(\text{H}_2\text{O})$ , Volborthite (ICSD_63282, Monoclinic, C12/m1), 99%. Sodium chloride 1%                    |                                                             |

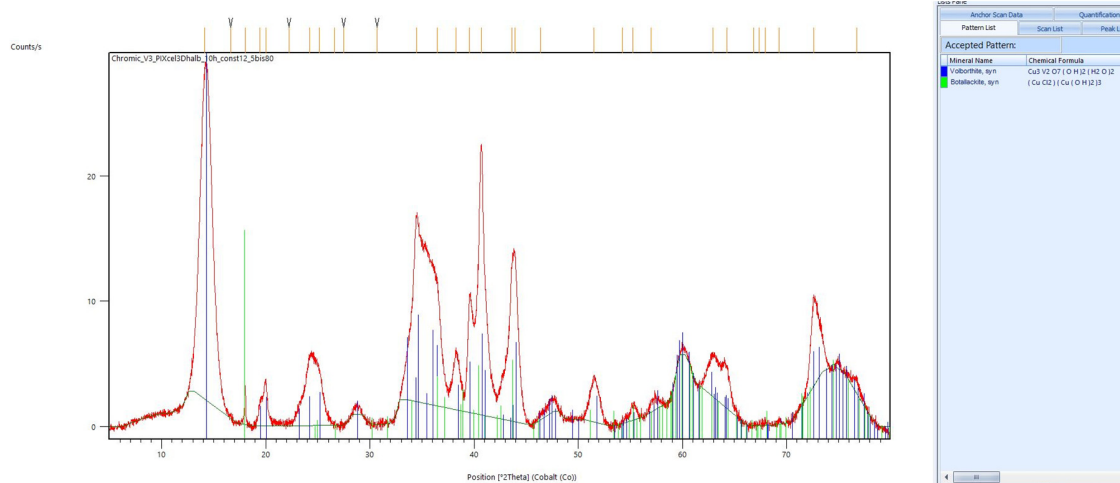

**Figure S1.** X-Ray diffraction pattern of Sample PS-1, copper vanadate,  $\text{Cu}_3\text{V}_2\text{O}_7(\text{OH})_2 \cdot 2\text{H}_2\text{O}$ , strip solution 0.05 M  $\text{CuSO}_4$  in 4 M  $\text{NaCl}$

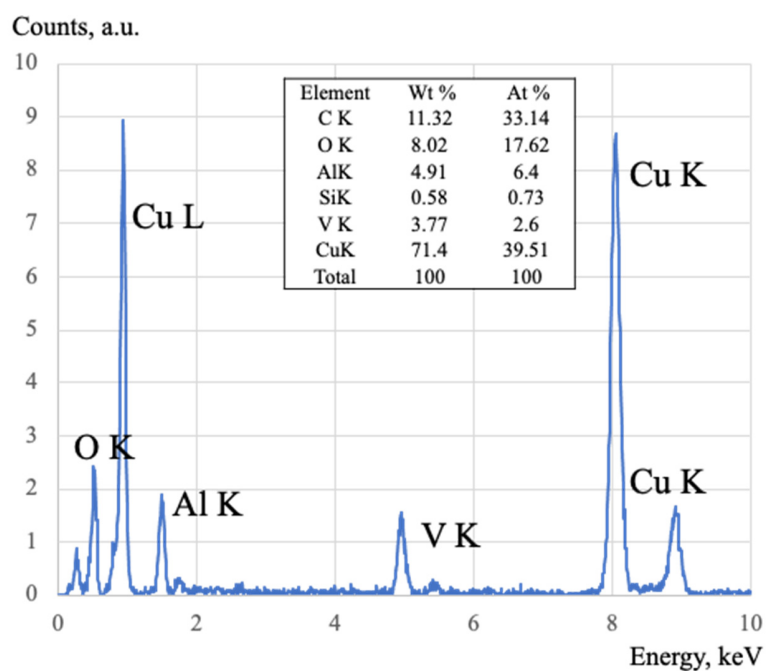

**Figure S2.** EDS pattern and chemical analysis (inset) of Sample PS-3

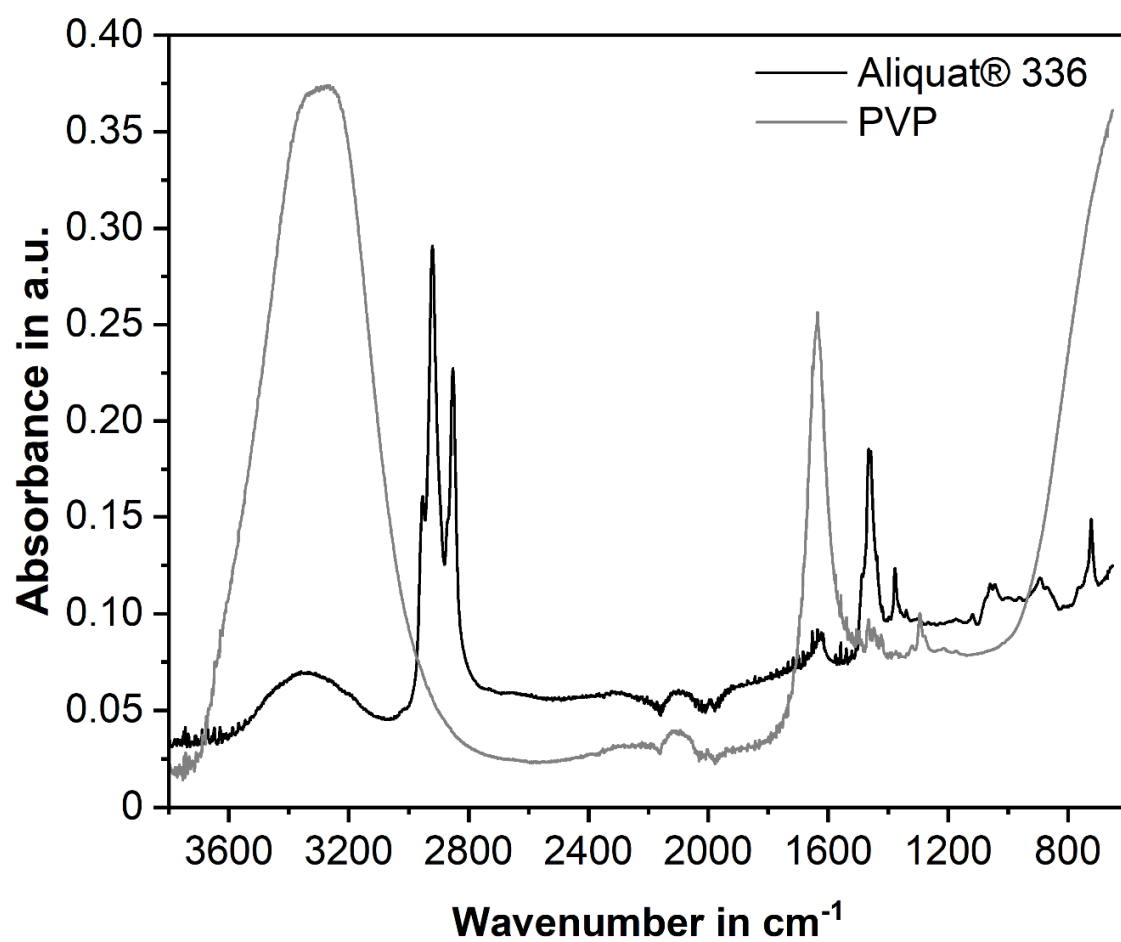

**Figure S3.** IR spectra of Aliquat 336 and PVP

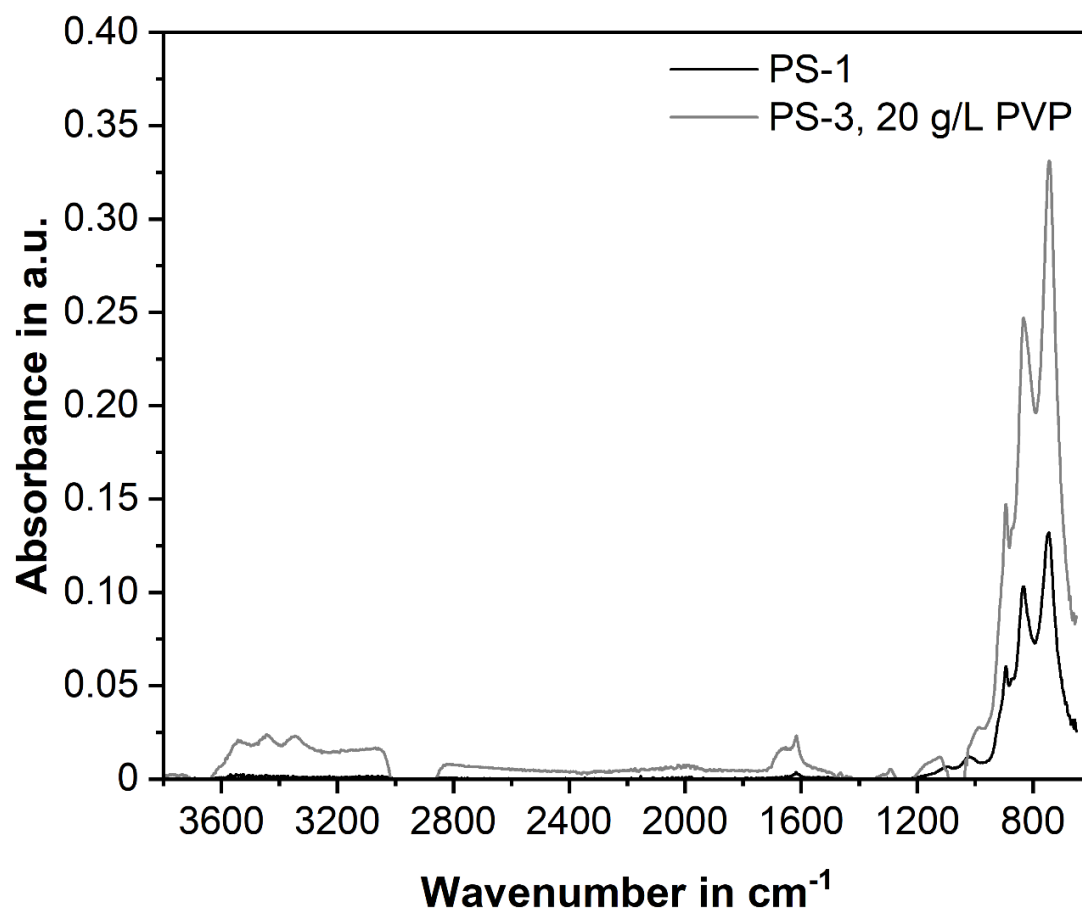

**Figure S4.** IR spectra of copper vanadate powders PS-1 and PS-3 prepared by precipitation stripping from Aliquat 336 organic solutions, PS-3 prepared in the presence of PVP
